# Supplementary material
Source: PubMed Central journal article supplement (PMC6461515)
Supplement: NIHMS1514268-supplement-1.pdf [file NIHMS1514268-supplement-1.pdf]

## **Inhibition of TAZ contributes radiation-induced senescence and growth arrest in glioma cells**

Lei Zhang<sup>1,2</sup>, Fang-Ling Cheng<sup>3</sup>, Yiju Wei<sup>1</sup>, Lijun Zhang<sup>4,5</sup>, Dong-Sheng Guo<sup>3</sup>, Bao-Feng Wang<sup>3</sup> and Wei Li<sup>1,5,\*</sup>

### **Supplemental materials**

**Figure S1** Radiation induces cellular senescence in LN229 cells. (a) Cells were treated with indicated doses of ionizing radiation and subjected to colony formation assay. N=3. (b) Cells were treated with or without 8 Gy of ionizing radiation, cultured for 7 days, and subjected to  $\beta$ -gal staining. A field in each of the left panel was enlarged and shown in the correspondent right panel. Scale bars=200  $\mu$ M. (c) Cells were treated with or without 8 Gy of ionizing radiation, cultured for indicated days, and subjected to  $\beta$ -gal staining. N=3. \*\*P<0.01, \*\*\*P<0.001. (d) and (e) Cells were treated with or without 8 Gy of ionizing radiation, cultured for indicated days, and subjected to p-H2AX staining. Scale bars=20  $\mu$ M. Representative images from two independent experiments were shown.

**Figure S2** Gene expression in GBM cell lines. (a) A panel of indicated GBM cell lines cultured in regular petri dish were lysed and analyzed by western blotting. Representative blots from two independent experiments were shown. (b) and (c) the indicated GBM cells were cultured as in (a) and subjected to q-RT-PCR. N=2.

**Table S1. Clinical information of tumor samples**

| Patient No. | Gender | Age | Diagnosis                                                            | WHO Grade | Location                                                      | Treatment                                             | PFS (months) | OS (months) |
|-------------|--------|-----|----------------------------------------------------------------------|-----------|---------------------------------------------------------------|-------------------------------------------------------|--------------|-------------|
| 1           | F      | 60  | glioblastoma                                                         | 4         | left frontal lobe                                             | TMZ(1)                                                |              | 3.5         |
| 2           | M      | 38  | high grade glioma(WHO III),mainly are presented as oligodendroglioma | 3         | right frontal lobe                                            | RT+TMZ(6)                                             |              | 20          |
| 3           | M      | 58  | anaplastic astrocytoma(WHO III)                                      | 3         | right temporal lobe                                           | RT+TMZ(1)                                             |              | 28          |
| 4           | M      | 48  | diffuse astrocytoma(WHO II)                                          | 2         | right frontal lobe                                            | RT+TMZ(6)                                             |              | 33          |
| 5           | F      | 44  | oligoastrocytoma(WHO II)                                             | 2         | right temporal lobe                                           | RT+TMZ(6)                                             |              | 36          |
| 6           | M      | 52  | diffuse astrocytoma(WHO II)                                          | 2         | right temporal and insular lobe                               | RT+TMZ(6)                                             |              | 32          |
| 7           | M      | 56  | glioblastoma                                                         | 4         | right temporal lobe                                           | first:RT+TMZ(6) ;<br>recurrence: surgery+BEV+CPT-11   |              | 32          |
| 8           | M      | 56  | glioblastoma                                                         | 4         | right temporal lobe                                           | first:RT+TMZ(6) +IT;<br>recurrence:surgery+TMZ(6)+BEV |              | 24          |
| 9           | M      | 33  | glioblastoma                                                         | 4         | left occipital lobe                                           | first:none;<br>recurrence:surgery+RT+TMZ(6)           |              | 24          |
| 10          | F      | 55  | glioblastoma                                                         | 4         | left frontoparietal lobe                                      | first:RT+TMZ(6);<br>recurrence:surgery+TMZ            |              | 26          |
| 11          | F      | 44  | glioblastoma                                                         | 4         | left frontoparietal lobe                                      | TMZ(2)                                                |              | 26          |
| 12          | M      | 49  | glioblastoma                                                         | 4         | right temporal lobe                                           | TMZ(6)                                                |              | 18          |
| 13          | F      | 5   | glioblastoma                                                         | 4         | right frontal lobe                                            | none                                                  |              | 5           |
| 14          | M      | 65  | glioblastoma                                                         | 4         | right frontal lobe                                            | RT                                                    |              | 19          |
| 15          | F      | 60  | glioblastoma                                                         | 4         | left frontal lobe                                             | TMZ(1)                                                |              | 3.5         |
| 16          | M      | 38  | glioblastoma                                                         | 4         | right frontal lobe                                            | RT+TMZ(6)                                             |              | 20          |
| 17          | M      | 58  | glioblastoma                                                         | 4         | right temporal lobe                                           | RT+TMZ(6)                                             |              | 28          |
| 18          | M      | 61  | glioblastoma                                                         | 4         | right temporal lobe                                           | TMZ(2)                                                |              | 3           |
| 19          | M      | 47  | glioblastoma                                                         | 4         | right frontotemporal lobe and basal ganglia area              | RT+TMZ(4)                                             |              | 12          |
| 20          | F      | 72  | glioblastoma                                                         | 4         | right frontotemporal and insular lobe                         | TMZ(1)                                                |              | 2           |
| 21          | M      | 44  | glioblastoma                                                         | 4         | right frontal lobe                                            | TMZ(6)                                                |              | 15          |
| 22          | F      | 73  | glioblastoma                                                         | 4         | left temporal lobe                                            | RT+TMZ (6) +BEV                                       |              | 32          |
| 23          | F      | 50  | glioblastoma                                                         | 4         | left parietal lobe                                            | RT+TMZ (6)                                            |              | 40          |
| 24          | F      | 49  | glioblastoma                                                         | 4         | right frontal lobe                                            | TMZ (6)                                               |              | 9           |
| 25          | M      | 55  | gliosarcoma                                                          | 4         | right frontal lobe                                            | RT+TMZ (6)                                            |              | 12          |
| 26          | M      | 63  | glioblastoma                                                         | 4         | left temporal lobe                                            | TMZ (3)                                               |              | 6           |
| 27          | M      | 58  | glioblastoma                                                         | 4         | right temporal and insular lobe, bilateral basal ganglia area | none                                                  |              | 7           |
| 28          | M      | 35  | glioblastoma                                                         | 4         | left occipitotemporal lobe                                    | TMZ(6)                                                |              | 8           |
| 29          | M      | 30  | glioblastoma                                                         | 4         | left frontal lobe                                             | RT+TMZ(6)                                             |              | 40          |
| 30          | F      | 56  | glioblastoma                                                         | 4         | left frontotemporal lobe                                      | RT+TMZ(6)                                             |              | 18          |
| 31          | F      | 31  | glioblastoma                                                         | 4         | right frontal lobe                                            | chinese medicine                                      |              | 13          |
| 32          | M      | 64  | glioblastoma                                                         | 4         | left temporoparietal lobe                                     | RT+TMZ(6)                                             |              | 20          |
| 33          | M      | 55  | glioblastoma                                                         | 4         | left temporal lobe                                            | TMZ(1)                                                |              | 2.5         |
| 34          | F      | 56  | recurrent glioblastoma                                               | 4         | left frontal lobe                                             | RT+TMZ(6)                                             | 2            | 8           |
| 35          | M      | 58  | recurrent glioblastoma                                               | 4         | right occipitotemporal lobe                                   | RT+TMZ(6)                                             | 8            | 10          |

|    |   |    |                                           |   |                             |                                                                           |    |    |
|----|---|----|-------------------------------------------|---|-----------------------------|---------------------------------------------------------------------------|----|----|
| 36 | M | 57 | recurrent glioblastoma                    | 4 | right frontotemporal lobe   | RT+TMZ(?)+IT                                                              | 11 | 12 |
| 37 | M | 34 | recurrent glioblastoma                    | 4 | left occipital lobe         | RT+TMZ                                                                    | 8  | 12 |
| 38 | F | 56 | recurrent glioblastoma                    | 4 | left frontoparietal lobe    | TMZ                                                                       | 12 | 13 |
| 39 | F | 46 | recurrent glioblastoma                    | 4 | right frontal lobe          | first:RT+TMZ(2);<br>recurrence:surgery+TMZ                                | 24 | 17 |
| 40 | M | 49 | recurrent glioblastoma                    | 4 | right temporal lobe         | TMZ                                                                       | 18 | 9  |
| 41 | F | 53 | recurrent glioblastoma                    | 4 | left frontal lobe           | TMZ                                                                       | 36 | 12 |
| 42 | F | 50 | recurrent glioblastoma                    | 4 | left occipitotemporal lobe  | TMZ                                                                       | 13 | 15 |
| 43 | M | 37 | recurrent glioblastoma                    | 4 | left frontal lobe           | first:RT+TMZ ( 6 ) ;<br>recurrence:surgery+TMZ                            | 8  | 6  |
| 44 | F | 52 | recurrent glioblastoma                    | 4 | right frontal lobe          | first:AED;<br>recurrence:RT+TMZ(6)                                        | 27 | 40 |
| 45 | M | 32 | recurrent anaplastic astrocytoma(WHO III) | 3 | right parietal lobe         | RT+TMZ(6)                                                                 | 20 | 8  |
| 46 | M | 36 | Recurrent anaplastic astrocytoma(WHO III) | 3 | left frontoparietal lobe    | RT+TMZ(6)                                                                 | 13 | 23 |
| 47 | M | 53 | Recurrent glioblastoma                    | 4 | left temporal lobe          | RT+CPT-11+DDP                                                             | 13 | 24 |
| 48 | F | 58 | recurrent anaplastic astrocytoma(WHO III) | 3 | right occipitoparietal lobe | RT+TMZ(6)                                                                 | 4  | 14 |
| 49 | F | 47 | recurrent anaplastic astrocytoma(WHO III) | 3 | left frontal lobe           | RT+TMZ(18)                                                                | 4  | 28 |
| 50 | F | 54 | recurrent glioblastoma                    | 4 | right parietal lobe         | none                                                                      | 14 | 25 |
| 51 | M | 33 | recurrent glioblastoma                    | 4 | right frontal lobe          | first:RT+TMZ(4)+chinese medicine;<br>recurrence:surgery+TMZ+CPT-11+BEV(6) | 5  | 10 |
| 52 | F | 44 | recurrent glioblastoma                    | 4 | right frontal lobe          | TMZ(6)                                                                    | 10 | 38 |
| 53 | F | 51 | recurrent glioblastoma                    | 4 | right frontal lobe          | none                                                                      | 25 | 2  |
| 54 | F | 55 | recurrent anaplastic astrocytoma(WHO III) | 3 | left parietal lobe          | first:RT+TMZ(6)<br>recurrence:TMZ(6)                                      | 5  | 18 |
| 55 | F | 6  | recurrent glioblastoma                    | 4 | right frontotemporal lobe   | none                                                                      | 5  | 5  |
| 56 | M | 65 | recurrent glioblastoma                    | 4 | left frontoparietal lobe    | RT                                                                        | 3  | 15 |
| 57 | M | 60 | recurrent glioblastoma                    | 4 | left parietoccipital lobe   | RT+TMZ(6)                                                                 | 5  | 8  |
| 58 | F | 43 | recurrent anaplastic astrocytoma(WHO III) | 3 | right temporal lobe         | RT                                                                        | 15 | 10 |
| 59 | F | 40 | recurrent anaplastic astrocytoma(WHO III) | 3 | right frontal lobe          | first:chinese medicine;<br>+TMZ                                           | 12 | 30 |
| 60 | F | 38 | recurrent glioblastoma                    | 4 | right temporal lobe         | none                                                                      | 10 | 15 |
| 61 | M | 42 | recurrent glioblastoma                    | 4 | right temporal lobe         | chinese medicine                                                          | 5  | 15 |

Table S2. Cellular distribution of TAZ in GBM tumors.

|                       | PT  | Primary | IR-R | No-IR-R |
|-----------------------|-----|---------|------|---------|
| Cytoplasm (%)         | 100 | 44      | 94   | 13      |
| Cytoplasm/Nucleus (%) | 0   | 56      | 6    | 87      |

Cytoplasm: only cytoplasmic compartment show TAZ signal.

Cytoplasm/Nucleus: both cytoplasmic and nuclear compartments show TAZ signal.

Table S3. Cellular distribution of  $\beta$ -catenin in GBM tumors.

|                       | PT  | Primary | IR-R | No-IR-R |
|-----------------------|-----|---------|------|---------|
| Cytoplasm (%)         | 100 | 71      | 71   | 37      |
| Cytoplasm/Nucleus (%) | 0   | 29      | 29   | 63      |

Cytoplasm: only cytoplasmic compartment show  $\beta$ -catenin signal.

Cytoplasm/Nucleus: both cytoplasmic and nuclear compartments show  $\beta$ -catenin signal.

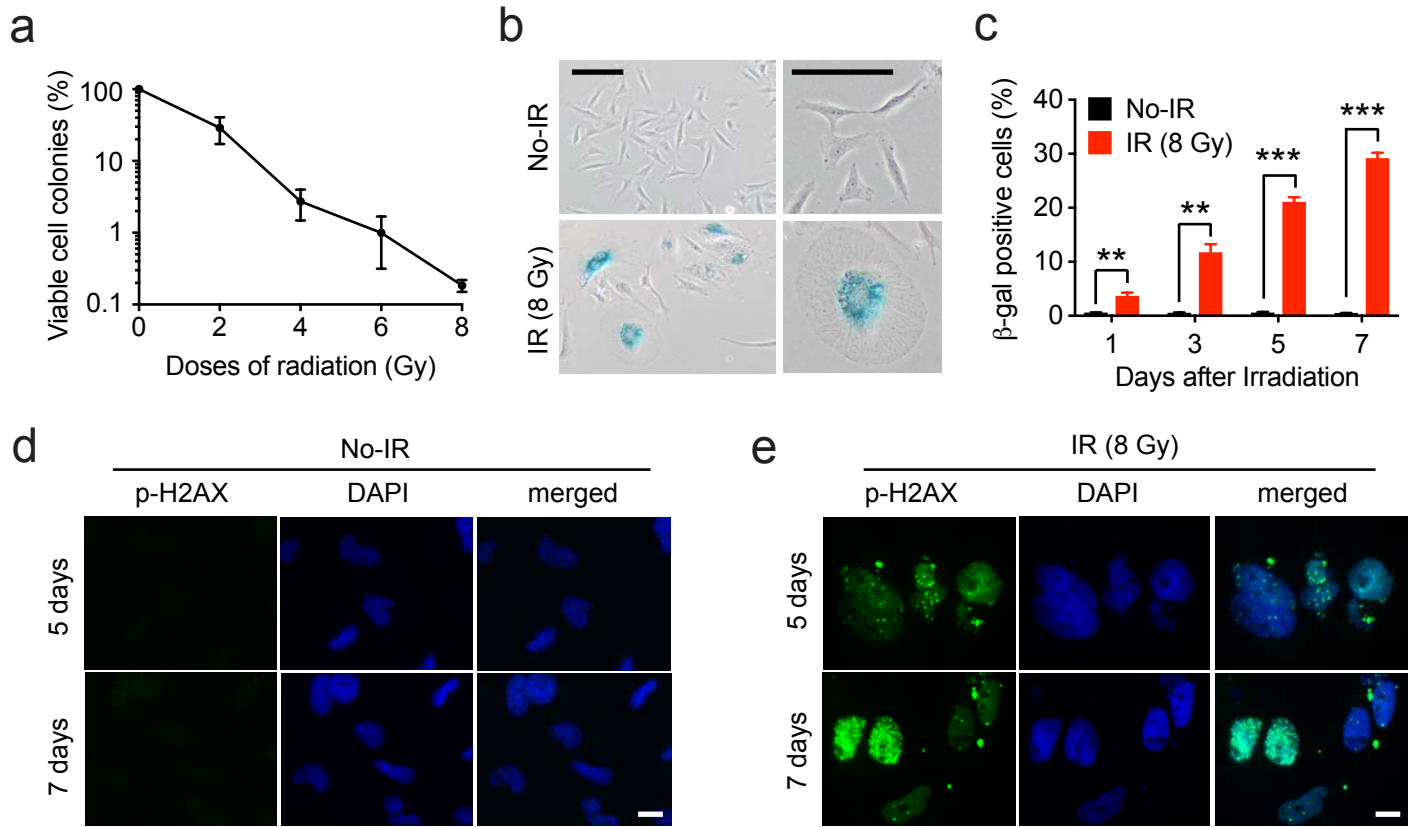

Figure S1

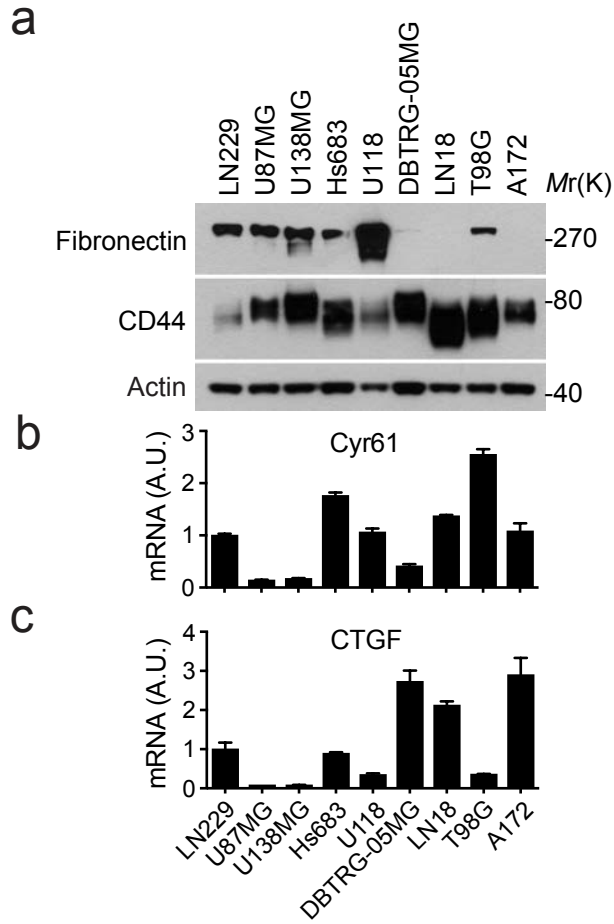

**Figure S2**
